# Supplementary material for: “If somebody had told me I’d feel like I do now, I wouldn’t have believed them…” Older adults’ experiences of the BELL trial: a qualitative study
Source: bioRxiv or medRxiv preprint supplement (doi:10.1101/2021.07.15.21260399), 2021-08-27
Supplement: Supplementary file [file media-1.pdf]

## The BELL Trial: Consolidated criteria for reporting qualitative studies (COREQ): 32-item checklist.

| No.                                            | Item                                     | Guide questions / description                                                                                                                                    | Page |
|------------------------------------------------|------------------------------------------|------------------------------------------------------------------------------------------------------------------------------------------------------------------|------|
| <b>Domain 1: Research team and reflexivity</b> |                                          |                                                                                                                                                                  |      |
| <i>Personal Characteristics</i>                |                                          |                                                                                                                                                                  |      |
| 1.                                             | Interviewer/facilitator                  | Which author/s conducted the interview or focus group?                                                                                                           | 2    |
| 2.                                             | Credentials                              | What were the researcher's credentials? e.g., PhD, MD                                                                                                            | 8    |
| 3.                                             | Occupation                               | What was their occupation at the time of the study?                                                                                                              | 8    |
| 4.                                             | Gender                                   | Was the researcher male or female?                                                                                                                               | 2    |
| 5.                                             | Experience and training                  | What experience or training did the researcher have?                                                                                                             | 8    |
| <i>Relationship with participants</i>          |                                          |                                                                                                                                                                  |      |
| 6.                                             | Relationship established                 | Was a relationship established prior to study commencement?                                                                                                      | 2, 8 |
| 7.                                             | Participant knowledge of the interviewer | What did the participants know about the researcher? e.g., <i>personal goals, reasons for doing the research</i>                                                 | 2, 8 |
| 8.                                             | Interviewer characteristics              | What characteristics were reported about the interviewer/facilitator? e.g., <i>bias, assumptions, reasons and interests in the research topic</i>                | 8    |
| <b>Domain 2: study design</b>                  |                                          |                                                                                                                                                                  |      |
| <i>Theoretic framework</i>                     |                                          |                                                                                                                                                                  |      |
| 9.                                             | Methodological orientation and Theory    | What methodological orientation was stated to underpin the study? e.g., <i>grounded theory, discourse analysis, ethnography, phenomenology, content analysis</i> | 3    |
| <i>Participant selection</i>                   |                                          |                                                                                                                                                                  |      |
| 10.                                            | Sampling                                 | How were participants selected? e.g., <i>purposive, convenience, consecutive, snowball</i>                                                                       | 2    |
| 11.                                            | Method of approach                       | How were participants approached? e.g., <i>face-to-face, telephone, mail, email</i>                                                                              | 2    |
| 12.                                            | Sample size                              | How many participants were in the study?                                                                                                                         | 2    |
| 13.                                            | Non-participation Setting                | How many people refused to participate or dropped out? Reasons?                                                                                                  | 2    |
| <i>Setting</i>                                 |                                          |                                                                                                                                                                  |      |
| 14.                                            | Setting of data collection               | Where was the data collected? e.g., <i>home, clinic, workplace</i>                                                                                               | 2    |
| 15.                                            | Presence of non-participants             | Was anyone else present besides the participants and researchers?                                                                                                | 2    |
| 16.                                            | Description of sample                    | What are the important characteristics of the sample? e.g., <i>demographic data, date</i>                                                                        | 2    |
| <i>Data collection</i>                         |                                          |                                                                                                                                                                  |      |
| 17.                                            | Interview guide                          | Were questions, prompts, guides provided by the authors? Was it pilot tested?                                                                                    | 2    |
| 18.                                            | Repeat interviews                        | Were repeat interviews carried out? If yes, how many?                                                                                                            | 2    |
| 19.                                            | Audio/visual recording                   | Did the research use audio or visual recording to collect the data?                                                                                              | 2    |
| 20.                                            | Field notes                              | Were field notes made during and/or after the interview or focus group?                                                                                          | 2    |
| 21.                                            | Duration                                 | What was the duration of the interviews or focus group?                                                                                                          | 2    |
| 22.                                            | Data saturation                          | Was data saturation discussed?                                                                                                                                   | 8    |
| 23.                                            | Transcripts returned                     | Were transcripts returned to participants for comment and/or correction?                                                                                         | 2    |
| <b>Domain 3: analysis and findings</b>         |                                          |                                                                                                                                                                  |      |
| <i>Data analysis</i>                           |                                          |                                                                                                                                                                  |      |
| 24.                                            | Number of data coders                    | How many data coders coded the data?                                                                                                                             | 3    |

|                  |                                |                                                                                                                                           |     |
|------------------|--------------------------------|-------------------------------------------------------------------------------------------------------------------------------------------|-----|
| 25.              | Description of the coding tree | Did authors provide a description of the coding tree?                                                                                     | n/a |
| 26.              | Derivation of themes           | Were themes identified in advance or derived from the data?                                                                               | 3   |
| 27.              | Software                       | What software, if applicable, was used to manage the data?                                                                                | 2   |
| 28.              | Participant checking           | Did participants provide feedback on the findings?                                                                                        | 2   |
| <i>Reporting</i> |                                |                                                                                                                                           |     |
| 29.              | Quotations presented           | Were participant quotations presented to illustrate the themes / findings? Was each quotation identified? <i>e.g., participant number</i> | 3-6 |
| 30.              | Data and findings consistent   | Was there consistency between the data presented and the findings?                                                                        | 3-6 |
| 31.              | Clarity of major themes        | Were major themes clearly presented in the findings?                                                                                      | 3-6 |
| 32.              | Clarity of minor themes        | Is there a description of diverse cases or discussion of minor themes?                                                                    | 6-8 |

---
