# Supplementary material for: “If somebody had told me I’d feel like I do now, I wouldn’t have believed them…” Older adults’ experiences of the BELL trial: a qualitative study
Source: bioRxiv or medRxiv preprint supplement (doi:10.1101/2021.07.15.21260399), 2021-08-27
Supplement: Supplementary file [file media-3.pdf]

# Older adults' experiences of supervised hardstyle kettlebell training: A qualitative study from the BELL pragmatic controlled trial

## SurveyMonkey questionnaire: *Positive and beneficial effects*

1. Describe any physical affects you have experienced from kettlebell training which you feel have been positive or beneficial.
2. Describe any psycho-social affects you have experienced from kettlebell training which you feel have been positive or beneficial.
3. What 3 things have you enjoyed the most?
  - i.
  - ii.
  - iii.
4. What would you say are the benefits of kettlebell training?
5. What did you find to be especially easy, achievable, and motivating? (multiple responses allowed)
  - a. Easy
  - b. Achievable
  - c. Motivating

- |                                                                                                |                       |                       |                       |                       |                       |
|------------------------------------------------------------------------------------------------|-----------------------|-----------------------|-----------------------|-----------------------|-----------------------|
|                                                                                                | Definitely not        | Probably not          | Unsure                | Probably yes          | Definitely yes        |
| 6. Would you recommend kettlebell training to your friends of a similar age?                   | <input type="radio"/> | <input type="radio"/> | <input type="radio"/> | <input type="radio"/> | <input type="radio"/> |
|                                                                                                | Very unlikely         | Unlikely              | Neutral               | Likely                | Very likely           |
| 7. If similar training was available in the community, how likely is it that you would attend? | <input type="radio"/> | <input type="radio"/> | <input type="radio"/> | <input type="radio"/> | <input type="radio"/> |
