# Supplementary material for: “If somebody had told me I’d feel like I do now, I wouldn’t have believed them…” Older adults’ experiences of the BELL trial: a qualitative study
Source: bioRxiv or medRxiv preprint supplement (doi:10.1101/2021.07.15.21260399), 2021-08-27
Supplement: Supplementary file [file media-4.pdf]

## Older adults' experiences of supervised hardstyle kettlebell training: A qualitative study from the BELL pragmatic controlled trial

### SurveyMonkey questionnaire: *Negative and undesirable effects*

1. Describe any physical affects you have experienced from kettlebell training which you feel have been negative (specifically including injury, but excluding DOMS) or undesirable/harmful
2. Describe any psycho-social affects you have experienced from kettlebell training which you feel have been negative or undesirable/harmful
3. Are there any reasons that you would not recommend kettlebell training to other people of your age and background?
4. What 3 things have you least enjoyed about kettlebell training; either being a participant in the group, or specifically related to training with kettlebells?
  - i.
  - ii.
  - iii.
5. What would you say are the potential harms of kettlebell training?
6. What did you find to be especially hard, unachievable, and demotivating? (multiple responses allowed).
  - a. Hard
  - b. Unachievable
  - c. Demotivating
